1 **Transformation from independent to integrative coding of multi-object arrangements**  
2 **in human visual cortex**

3

4 Daniel Kaiser<sup>1,2,\*</sup>, Marius V. Peelen<sup>1</sup>

5 <sup>1</sup>*Center for Mind/Brain Sciences, University of Trento, 38068 Rovereto (TN), Italy*

6 <sup>2</sup>*Institute of Psychology, Freie Universität Berlin, 14195 Berlin-Dahlem, Germany*

7

8 \*Correspondence to:

9 Daniel Kaiser

10 Institute of Psychology, Freie Universität Berlin

11 Habelschwerdter Allee 45, 14195 Berlin-Dahlem, Germany

12 [danielkaiser.net@gmail.com](mailto:danielkaiser.net@gmail.com)

13

14

15 **Abstract**

16 The human visual system has adapted to process cluttered scenes containing dozens of  
17 regularly arranged objects. The regularity among objects critically contributes to the  
18 efficiency of naturalistic vision. Recent studies investigating multiple object perception  
19 have demonstrated that visual cortex responses to multi-object displays can be  
20 accurately modeled by a linear combination of responses to individual objects, revealing  
21 independent processing of simultaneously presented objects. Here we use fMRI to show  
22 that this independence partly breaks down when objects are positioned according to  
23 frequently experienced configurations. Participants viewed pairs of objects that formed  
24 minimalistic two-object scenes (e.g., a “living room” consisting of a sofa and television)  
25 presented in their regularly experienced spatial arrangement or in an irregular  
26 arrangement (with interchanged positions). Additionally, single objects were presented  
27 centrally and in isolation. Multi-voxel activity patterns evoked by the object pairs were  
28 modeled as the average of the response patterns evoked by the two single objects  
29 forming the pair. In two experiments, this approximation in object-selective cortex (OSC)  
30 was significantly less accurate for the regularly than the irregularly positioned pairs,  
31 indicating integration of individual object representations. More detailed analysis  
32 revealed a transition from independent to integrative coding along the posterior-anterior  
33 axis of the visual cortex, with the independent component (but not the integrative  
34 component) being almost perfectly predicted by object selectivity across the visual  
35 hierarchy. These results reveal a transitional stage between individual object and multi-  
36 object coding in visual cortex, providing a possible neural correlate of efficient  
37 processing of regularly positioned objects in natural scenes.

38

## 39 Introduction

40 Our everyday environments are cluttered, consisting of a large number of  
41 separable objects. It is therefore of fundamental importance to understand how the  
42 visual system processes the multitude of objects contained in real-world scenes in an  
43 efficient way.

44 However, much of our knowledge about the neural mechanisms of object  
45 perception comes from neuroimaging studies using single objects as stimuli. These  
46 studies have linked object perception to activity in object-selective cortex (OSC), a region  
47 which preferentially responds to objects compared to scrambled objects (Grill-Spector,  
48 2003; Malach et al., 1995) and exhibits reliably discriminable response patterns for  
49 different types of objects (Eger et al., 2008; Haxby et al., 2001; Kriegeskorte et al., 2008).  
50 Further neuroimaging work has demonstrated that OSC responses show some degree of  
51 size- and location-invariance (Cichy et al., 2011; Vuilleumier et al., 2002) and partly reflect  
52 perceived rather than physical object properties (Haushofer et al., 2008; Kourtzi and  
53 Kanwisher, 2001), suggesting that OSC activation can be linked to behavioral  
54 performance in object recognition (Grill-Spector et al., 2000; Williams et al., 2007).

55 Recently, studies have moved towards more naturalistic conditions, measuring  
56 OSC responses when multiple objects are presented simultaneously. These studies have  
57 demonstrated that OSC codes multiple objects in an independent, linearly additive way:  
58 Responses to pairs of objects could be modeled as a linear combination (e.g., the  
59 average) of the responses to their constituent single objects (Agam et al., 2010; Baek et  
60 al., 2013; Kaiser et al., 2014b; Kubilius et al., 2015; MacEvoy and Epstein, 2009; Reddy et al.,  
61 2009; Zoccolan et al., 2005), even when the objects were embedded in complex natural  
62 scenes (MacEvoy and Epstein, 2011).

63           Importantly, however, individual objects in natural scenes usually adhere to  
64   typical and recurring positional structures: constrained by their function, their  
65   relationship with other objects, and physical properties of the world, objects appear in  
66   predictable locations relative to each other (e.g., sofas facing TV sets, or cars stopping in  
67   front of traffic lights). Previous research has demonstrated that such inter-object  
68   regularities facilitate behavioral performance in capacity-limited tasks (Bar, 2004; Chun,  
69   2000; Kaiser et al., 2014a; Oliva and Torralba, 2007; Wolfe et al., 2011), suggesting that  
70   regularly positioned object arrangements are more efficiently processed at a neural level.  
71   In the current study, we provide evidence that the visual system integrates  
72   representations of regularly positioned objects, revealing a transformation from  
73   independent to integrative coding of multiple objects along the posterior-anterior axis of  
74   the visual processing hierarchy.

75           In two fMRI experiments, participants viewed pairs of objects that formed  
76   minimalistic versions of scenes (e.g., a "living room", consisting of a sofa and a TV; Fig. 1,  
77   **A**). These pairs could be arranged in a regular, typically encountered way (e.g., the sofa  
78   facing the TV) or in an irregular way (with the two objects exchanged). Additionally, each  
79   single object was presented centrally and in isolation. The multi-voxel response pattern  
80   evoked by each pair was then modeled by the average of the patterns evoked by its  
81   constituent objects. Replicating previous observations (Kaiser et al., 2014b; Kubilius et al.,  
82   2015; MacEvoy and Epstein, 2009, 2011), we find that OSC response patterns evoked by a  
83   pair can be accurately predicted by the average response patterns evoked by its  
84   constituent objects. Crucially, however, this linear approximation of the pair response  
85   depended on the relative position of the objects: Pair approximation in OSC was less  
86   accurate for regularly positioned pairs than for irregularly positioned pairs, showing that

87 the independence of multiple object processing breaks down when objects are  
88 positioned regularly. More detailed analyses revealed a transformation from  
89 independent to integrative representations of regularly positioned object pairs along the  
90 posterior-anterior axis of the visual cortex. The integrative component of multi-object  
91 processing reflects an emerging tuning to positional structures in real-world scenes.  
92

## 93 **Materials and Methods**

### 94 *Participants*

95           Fifteen healthy adults (6 male; mean age 24.6 years, SD=3.3) took part in  
96 Experiment 1, and 16 healthy adults took part in Experiment 2 (8 male; mean age 24.7  
97 years, SD=3.0). All participants had normal or corrected-to-normal visual acuity. All  
98 procedures were carried out in accordance with the Declaration of Helsinki and were  
99 approved by the ethical committee of the University of Trento. Due to excessive head  
100 movement, one participant was excluded from Experiment 1. Two participants were  
101 excluded from Experiment 2, one due to excessive head movement, and one due to bad  
102 functional localizer data, not allowing for a reliable definition of object-selective voxels.

103

### 104 *Stimuli*

105           The stimulus set comprised four pairs of objects, which each depicted a  
106 minimalistic version of a scene (Fig. 1, **A**). The four scenes were bathroom (toilet and  
107 sink), living room (sofa and television), street crossing (car and traffic lights), and  
108 playground (seesaw and slide). The stimuli were created by cutting the stimuli directly  
109 from a complete scene images, leaving the size and position the same as in the original  
110 scene (“regular” condition). For each scene, a second version was created where the  
111 object positions were swapped (“irregular” condition). These irregular versions  
112 contained the same objects, but the arrangement did not follow the typical arrangement  
113 normally experienced in scenes. For each pair, a total of eleven different stimuli were  
114 used. In addition to the pair stimuli we also showed the eight single objects centrally, and  
115 in isolation. For Experiment 2, additionally a set of 22 scenes (11 indoor rooms, 11 outdoor  
116 street scenes) was used; none of these scenes contained any of the objects that

117 constituted the pairs. All stimuli were surrounded by a black frame, which subtended a  
118 visual angle of  $10^{\circ} \times 7.5^{\circ}$ . Stimulus presentation was controlled using MATLAB and  
119 Psychtoolbox (Brainard, 1997). The stimulation was back-projected onto a translucent  
120 screen placed at the end of the scanner bore. Participants viewed the screen through a  
121 tilted mirror mounted to the head coil.

122

### 123 *Experiment 1 procedure*

124         The experiment consisted of multiple runs of 5 minutes each. Half of the runs  
125 were object pair runs, and half of the runs were single object runs. During object pair  
126 runs, the four different pair types (bathroom, living room, street crossing, playground)  
127 were shown in each of the two conditions (regular and irregular). During single object  
128 runs, all constituent single objects were shown. Each run consisted of 18 blocks. Within  
129 each block, twelve stimuli were presented, with each stimulus being an exemplar of the  
130 same condition (e.g., a bathroom/irregular block would contain only bathroom pairs in  
131 irregular configuration). Each block contained all eleven pairs (i.e., exemplars) of a  
132 specific condition, and one-back image-level repetition of a specific pair (i.e., exemplar).  
133 Each stimulus was shown for 400ms, with an inter-stimulus-interval of 900ms (Fig. 1, **B**);  
134 each block thus lasted 15.6s. The first nine blocks of each run consisted of eight  
135 stimulation blocks and one block of fixation baseline (in randomized order). The second  
136 nine blocks of a run were the same blocks in mirror-reversed order. The experiment  
137 comprised ten runs (two participants only completed eight runs), always starting with a  
138 pair run and then alternating between single object and pair runs. Participants had to  
139 report one-back image repetitions by pressing a button.

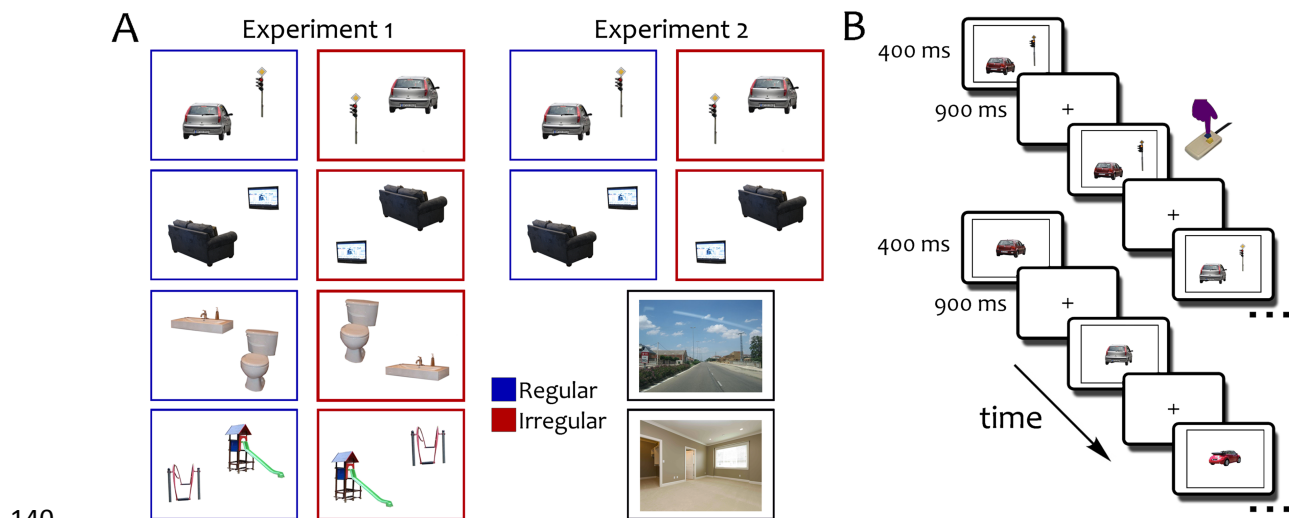

**Fig. 1.** Stimuli and paradigm. **A**, For Experiment 1, four pairs of objects were collected by directly cropping them from scenes of four types (bathroom, living room, street crossing, playground). Object pairs could be positioned in a regular way (as they appeared in the scenes) or in an irregular way (with their positions exchanged). In Experiment 2, only the living room and street crossing pairs were used and, in separate blocks, participants saw images of natural scene images (indoor room versus outdoor street scenes). **B**, Stimuli were presented for 400ms, separated by inter-stimulus intervals of 900ms. In each stimulation block, only pairs from one category and one regularity condition appeared (e.g., regularly positioned cars and traffic lights). Participants responded to one-back image-level repetitions. Similarly, the single objects belonging to the pairs were presented in separate runs, using the same block design and task.

### 153 *Experiment 2 procedure*

154 The procedure in Experiment 2 was identical to experiment 2 unless otherwise  
155 noted. In Experiment 2, only two of the object pairs were used (living room and street  
156 crossing). Additionally, in separate runs, the natural scene stimuli were presented (Fig. 1,  
157 **A**). These runs had an identical structure to the pair and single object runs. In alternating



158 order, only indoor rooms or outdoor street scenes appeared in a single block. In total,  
159 Experiment 2 consisted of 9 runs (3 pair runs, 3 single object runs, 3 scene runs), always  
160 starting with a pair run, followed by a single object run and by a scene run (this order was  
161 repeated three times).

162

### 163 *Functional localizer*

164 In both experiments, participants additionally completed two functional localizer  
165 runs of five minutes each. Participants performed a one-back task while viewing images  
166 of faces, houses, everyday objects, and phase-scrambled versions of these objects. Each  
167 stimulus category included 36 individual exemplars. Within each run, there were four  
168 blocks of each stimulus category and four blocks of fixation baseline, with all blocks  
169 lasting 16s. Block order was randomized for the first ten blocks and then mirror-reversed  
170 for the remaining ten blocks. Each non-fixation block included two one-back stimulus  
171 repetitions.

172

### 173 *fMRI data acquisition and preprocessing*

174 MR imaging was conducted using a Bruker BioSpin MedSpec 4T head scanner  
175 (Bruker BioSpin, Rheinstetten, Germany), equipped with an eight-channel head coil.  
176 During the experimental runs, T2\*-weighted gradient-echo echo-planar images (EPI)  
177 were collected (repetition time TR=2.0s, echo time TE=33ms, 73° flip angle, 3 x 3 x 3mm  
178 voxel size, 1mm gap, 34 slices, 192mm field of view, 64×64 matrix size). Additionally, a T1-  
179 weighted image (MPRAGE; 1 x 1 x 1mm voxel size) was obtained as a high-resolution  
180 anatomical reference. All resulting data were preprocessed using MATLAB and SPM8. EPI  
181 volumes were realigned and coregistered to the structural image. Functional volumes

182 collected during the functional localizer runs were additionally smoothed with a 6mm  
183 full-width-half-maximum Gaussian kernel.

184

#### 185 *Region on interest definition*

186 The BOLD-signal of each voxel in each participant in the localizer runs was  
187 modeled using one regressor for each stimulus category, and six regressors for the  
188 movement parameters obtained from the realignment procedure. Object-selective  
189 cortex (OSC) (Malach et al., 1995) was localized using an object>scrambled contrast.  
190 Regions for both hemispheres were concatenated to form a bilateral ROI (Experiment 1:  
191 mean ROI size 1000 voxels, SE=35; Experiment 2: mean ROI size 1036 voxels, SE=45).  
192 Additionally, an early visual cortex (EVC) ROI was defined by inverse-normalizing an  
193 anatomical mask into individual-subject space (Experiment 1: mean ROI size 996 voxels,  
194 SE=8; Experiment 2: mean ROI size 969 voxels, SE=9). For both ROIs, an additional voxel  
195 selection criterion was adopted: as we expected that optimally pair-selective voxels  
196 allow for better approximation of the pair patterns by single-object patterns (Baeck et  
197 al., 2013; MacEvoy and Epstein, 2009), the OSC and EVC ROIs were intersected with  
198 voxels that could optimally discriminate between the different pairs. These voxels were  
199 selected from a whole-brain searchlight classification analysis (see below). A-priori, a  
200 voxel count of the 100 most pair-selective voxels was set for all analyses; to rule out that  
201 the results were specific to this particular number of selected voxels, the analysis was  
202 repeated with different voxel counts ranging from 20 to 500 (see Supplementary  
203 Information). For results obtained with a different selection method and for the results in  
204 scene-selective regions see the Supplementary Information.

205

## 206 *Univariate Analysis*

207           The BOLD-signal of each voxel in each participant was modeled using one  
208 regressor for each stimulus type, and six regressors for the movement parameters  
209 obtained from the realignment procedure. Activation differences were computed by  
210 averaging beta-weight estimates across voxels for each ROI. Significant differences  
211 between the regularly and irregularly positioned pairs were assessed using t-tests.

212

## 213 *Multi-voxel pattern analysis*

214           Multivariate pattern analysis (MVPA) was carried out on a TR-based level using  
215 the CoSMoMVPA toolbox (Oosterhof et al., 2016). For each voxel belonging to a specific  
216 ROI, TRs corresponding to the conditions of interest were selected by shifting the voxel-  
217 wise time-course of activation by three TRs (to account for the hemodynamic delay).  
218 Subsequently, for each run separately, activation values were extracted from the EPI-  
219 volumes for each TR coinciding with the onset of a specific condition; the activation  
220 values were then normalized by z-scoring the values for each voxel. For the decoding  
221 analyses, linear discriminant analysis (LDA) classifiers were trained on all but one runs,  
222 and tested on the remaining run; this procedure was repeated so that every run was left  
223 out once. Pair classification was also computed in a searchlight decoding analysis (which  
224 was used for guiding ROI definition): for this analysis, a spherical neighborhood of 100  
225 voxels was used to identify voxels in visual cortex that could optimally discriminate the  
226 different object pairs, irrespective of the regularity condition. Significant decoding was  
227 assessed by comparing classifier accuracy to chance performance, using t-tests. For the  
228 pair combination analysis, response patterns were averaged across all TRs belonging to a  
229 specific condition, resulting in a single response pattern for every condition. Single-object

230 response patterns for the two objects belonging to a specific pair (e.g., car and traffic  
231 light or sofa and TV) were averaged. Thus, for each pair three response patterns were  
232 available: (1) the response pattern evoked by the pair presented in the regular  
233 arrangement, (2) the response pattern evoked by the pair presented in the irregular  
234 arrangement, and (3) the average response pattern evoked by the two constituent  
235 objects. To assess pair approximation quality in the regular and irregular conditions  
236 separately, the average single object patterns were correlated to their corresponding  
237 pair response patterns (within-correlation) and to the pair patterns evoked by the non-  
238 corresponding pairs (between-correlation) (Fig. 2). For the scene approximation analysis  
239 in Experiment 2, pair response patterns were correlated with the corresponding scene  
240 response patterns (e.g., sofa/TV and indoor room scene; within-correlation) and the non-  
241 corresponding scene patterns (e.g., sofa/TV and outdoor street scene; between-  
242 correlation), separately for regular and irregular pairs. The difference between these  
243 within- and between-correlations was used as a measure of pair approximation quality.  
244 Approximation quality was then compared for the regular and irregular pairs by using  
245 paired t-tests. All correlations were Fisher-transformed prior to statistical analysis.  
246

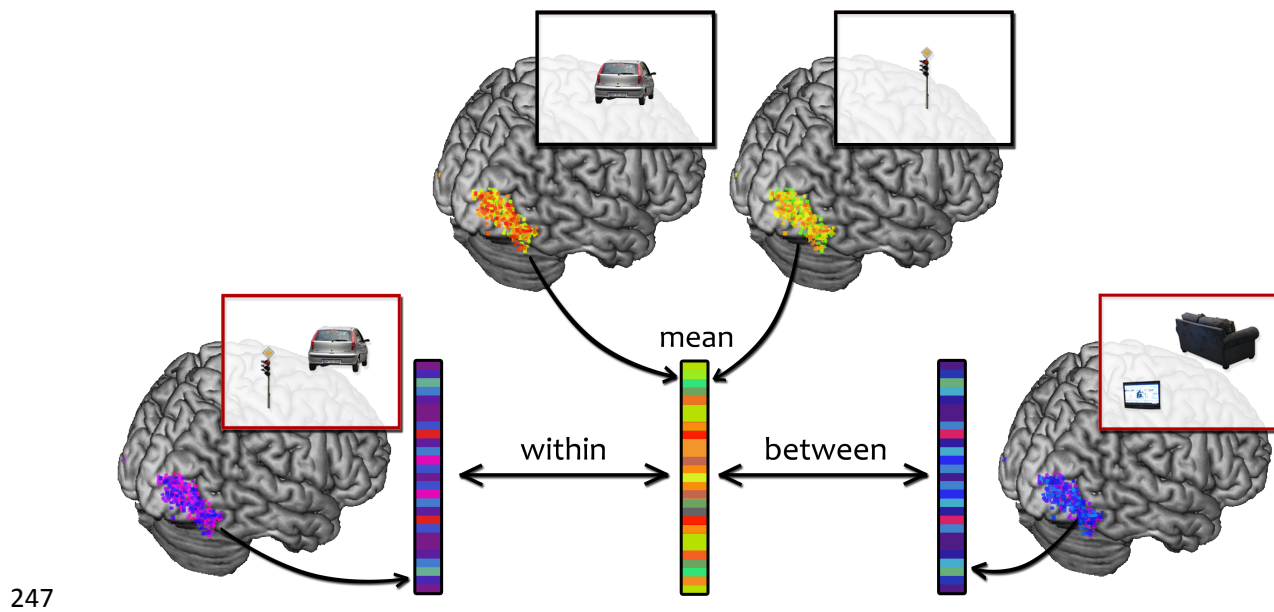

248 **Fig. 2.** Schematic illustration of the pair approximation analysis. For each ROI, the  
249 response pattern across hemispheres was extracted both for the single object and pair  
250 conditions. The single object patterns corresponding to each pair were then averaged  
251 and correlated with the pair-evoked pattern. The difference between the correlations  
252 with corresponding pairs (within-correlation) and non-corresponding pairs (between-  
253 correlation) was taken as a measure of approximation quality. This analysis was done  
254 separately for the regular and irregular pairs.

255

### 256 *Combined searchlight analysis*

257 To characterize the emergence of the regularity effect along the visual processing  
258 hierarchy, we performed a searchlight analysis, where we systematically moved a spatial  
259 voxel neighborhood along the anterior-posterior axis. For this analysis, the data from  
260 both experiments was combined. First, the occipitotemporal cortex (defined based on an  
261 anatomical mask) was divided into 40 slices. Each slice spanned 10mm in the anterior-  
262 posterior (Y) direction, with an inter-slice distance of 2mm (thus, individual slices were  
263 overlapping). X and Z coordinates of the occipitotemporal region were fully covered,

264 with the exception that the medial parts of occipital cortex were masked out to avoid  
265 sampling of EVC voxels. The 40 slices were then inverse-normalized to individual-  
266 participant space. Separately for each participant, within each slice the 100 voxels that  
267 allowed the most accurate pair decoding in a searchlight analysis were selected (similarly  
268 to the OSC analyses, see above). Subsequently, the pair approximation analysis (see  
269 above) was performed for these 100 voxels within each slice. To assess the general  
270 object-selectivity of the voxels in each slice, we computed the difference between the  
271 GLM beta weights for intact and scrambled object in the functional localizer runs (see  
272 above). To identify slices yielding significant effects, we used a threshold-free cluster-  
273 enhancement procedure (Smith and Nichols, 2009) with default parameters, using  
274 multiple-comparison correction based on a sign-permutation test (with null distributions  
275 created from 10,000 bootstrapping iterations) as implemented in CoSMoMVA  
276 (Oosterhof et al., 2016). The resulting Z-values were thresholded at  $Z > 1.96$  (i.e.,  $p < 0.05$ )  
277 to reveal significant decoding performance.

## 278 **Results**

### 279 *Experiment 1*

280 To investigate whether positional regularities impact neural responses in object-  
281 selective visual cortex (OSC), we presented participants with pairs of objects that  
282 commonly appear together in real world scenes, such as in a bathroom (toilet and sink),  
283 in a living room (sofa and TV), on a street crossing (car and traffic lights), or at a  
284 playground (seesaw and slide). These objects were directly cut from natural scene  
285 images and presented on a blank background (“regular” condition; Fig. 1, **A**). To  
286 investigate whether the way in which these object typically co-occur in the real world  
287 influences neural responses, we added a condition where we reversed the object  
288 locations (“irregular” condition, Fig. 1, **A**), keeping everything else identical. Additionally,  
289 the single objects belonging to the pairs were presented centrally (Fig. 1, **B**).

290 Functional MRI analyses primarily focused on two regions of interest: functionally  
291 defined object-selective cortex (OSC) and anatomically defined early-visual cortex (EVC)  
292 (see below for data from scene-selective ROIs). While we expected an effect of regularity  
293 on the representation of object pairs in OSC, no effect was expected in EVC, where more  
294 basic visual analysis takes place. Based on previous work (Baeck et al., 2013; MacEvoy &  
295 Epstein, 2009), we expected stronger effects in areas of OSC that preferentially  
296 represent information about the object pairs. To define voxels that contribute most to  
297 the coding of the object pairs, a whole-brain searchlight analysis was performed (see  
298 Materials and Methods), where linear classifiers were used to discriminate the four  
299 object pairs, regardless of their positioning (i.e., collapsed across the regular and  
300 irregular pairs). Based on this searchlight analysis, within OSC and EVC the 100 voxels

301 (see Supplementary Information for results with different voxel counts) that contributed  
302 most to the classification of the four pairs were selected (Fig. 3, **A**).

303 First, we tested whether the four object pairs were reliably discriminable in both  
304 OSC and EVC. Separately for regular and irregular pairs, a multivariate classification  
305 analysis of response patterns across voxels was performed. In a leave-one-run-out  
306 fashion, linear discriminant analysis (LDA) classifiers were used to classify response  
307 patterns to the four different pairs (see Materials and Methods). In both OSC and EVC,  
308 these classifiers performed highly above chance level (OSC: 42%; EVC: 40%). For both  
309 regions, no reliable difference in decoding accuracy was found when comparing the  
310 regular and irregular conditions directly (OSC:  $t[13]=0.8$ ,  $p=0.41$ ; EVC:  $t[13]=1.2$ ,  $p=0.25$ ).  
311 Similarly, no difference in univariate activation values between the two conditions was  
312 observed (OSC:  $t[13]=0.7$ ,  $p=0.48$ ; EVC:  $t[13]=1.1$ ,  $p=0.29$ ). This pattern of results argues  
313 against overall differences in signal quality, for example due to differences in attentional  
314 engagement for the two conditions: such an effect would be expected to result in a  
315 univariate and/or classification difference between the regular and irregular conditions.

316 Next, we tested whether the average of the response patterns evoked by the  
317 single objects could more accurately approximate the pattern evoked by the  
318 corresponding pairs than the pattern evoked by the non-corresponding pairs: for  
319 example, is the average of the response patterns for cars and traffic lights more similar  
320 to the response pattern for the car and traffic light pair than to the other pairs (e.g., to a  
321 TV and a sofa)? This analysis was performed separately for regular and irregular pairs (Fig.  
322 2). Correlations between the response patterns evoked by object pairs and the average  
323 patterns coming from the corresponding single objects (within-correlations) or from non-  
324 corresponding single objects (between-correlations) were computed (see Materials and



325 Methods). For both regular and irregular pairs separately, the difference between within-  
326 and between-correlations was taken as a measure of pair approximation quality.

327 In OSC, both regular and irregular pairs were discriminable using the average  
328 single object patterns (regular:  $t[13]=6.33$ ,  $p<0.001$ ; irregular:  $t[13]=11.2$ ,  $p<0.001$ ; Fig. 3,  
329 **B**). Despite the position change of the objects, also EVC patterns allowed for reliably  
330 discriminating between the four pairs (regular:  $t[13]=6.1$ ,  $p<0.001$ ; irregular:  $t[13]=4.7$ ,  
331  $p<0.001$ ). Next, to investigate whether regularly positioned pairs were processed  
332 differently from irregularly positioned pairs, discriminability was compared directly for  
333 regular and irregular pairs. Crucially, in OSC the average single object patterns more  
334 closely resembled the response patterns evoked by irregular pairs than by regular pairs  
335 ( $t[13]=2.5$ ,  $p=0.02$ ). By contrast, no such difference was found in EVC ( $t[13]=1.0$ ,  $p=0.32$ ;  
336 interaction with region:  $t[13]=2.9$ ,  $p=0.01$ ). These findings suggest that object processing  
337 in OSC is sensitive to typical real-world positioning.

338

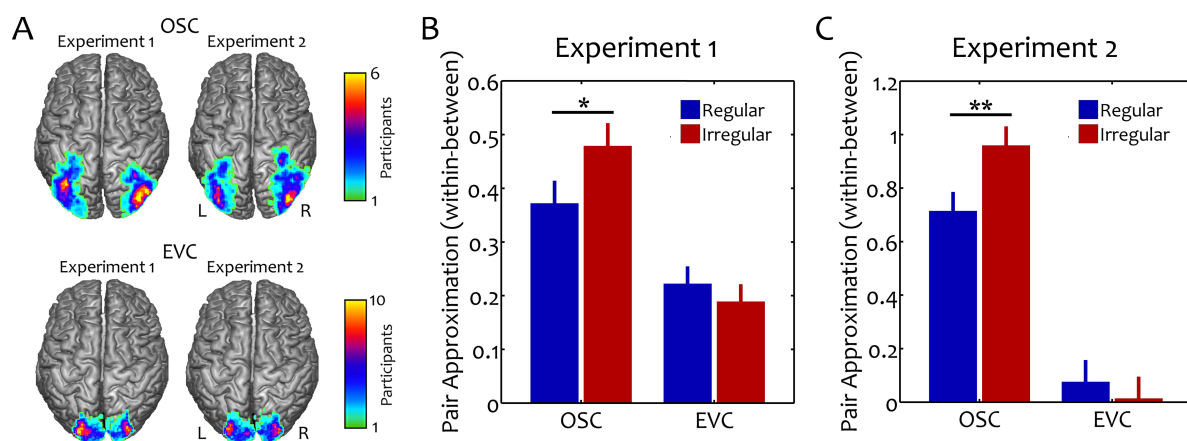

339

340 **Fig. 3.** Pair approximation results. **A**, Object selective cortex (OSC) and early visual cortex  
341 (EVC) maps depicting voxel-wise overlap between participants: Regions were defined on  
342 a single-subject level by selecting the 100 voxels that best discriminated the four pairs  
343 across the regularity conditions (see Materials and Methods) within either a functional

344 OSC mask or an anatomical EVC mask. For illustration purposes, the regions were  
345 normalized into standard space and overlaid on a brain template using MRICron (Rorden  
346 and Brett, 2000). **B**, The pair approximation analysis for Experiment 1 revealed a more  
347 accurate approximation of the irregularly positioned pairs than of the regularly  
348 positioned pairs in OSC, while no effect was found in EVC. **C**, In Experiment 2, this pattern  
349 of results was replicated, demonstrating sensitivity for object regularity structure in OSC,  
350 but not EVC. All error bars reflect standard errors of pairwise differences. (\* $p < 0.05$ ,  
351 \*\* $p < 0.01$ )

352

### 353 *Experiment 2*

354 In a second fMRI experiment we aimed to replicate the pattern of results. The  
355 structure of the experiment was largely identical to Experiment 1 (see Materials and  
356 Methods) and participants viewed images from two of the pairs also used in Experiment  
357 1 (sofa and TV; car and traffic lights).

358 First, as in Experiment 1, discriminability of the response patterns for the regular  
359 and irregular pairs was assessed using a two-way linear classification analysis in OSC and  
360 EVC. In both regions, classifiers performed highly above chance level (OSC: 69%; EVC:  
361 64%) and no difference in decoding accuracy was found when comparing the regular and  
362 irregular conditions directly (OSC:  $t[13]=0.02$ ,  $p=0.99$ ; EVC:  $t[13]=0.7$ ,  $p=0.51$ ). Additionally,  
363 no difference was observed in univariate activation values for the two conditions (OSC:  
364  $t[13]=0.01$ ,  $p=0.99$ ; EVC:  $t[13]=1.0$ ,  $p=0.32$ ).

365 Second, separately for regular and irregular pairs, constituent single-object  
366 response patterns were averaged for each pair to test how well these average response  
367 patterns could approximate the two pairs. As in Experiment 1, in OSC the average of the

368 response patterns evoked by the single objects was more similar to the pattern evoked  
369 by the corresponding than by the non-corresponding pairs, both for the regular pairs  
370 ( $t[13]=11.1$ ,  $p<0.001$ ) and the irregular pairs ( $t[13]=11.7$ ,  $p<0.001$ ; Fig. 3, C). By contrast (and  
371 unlike Experiment 1), the average single object patterns did not accurately approximate  
372 the pair patterns in EVC (regular pairs:  $t[13]=0.8$ ,  $p=0.44$ ; irregular pairs:  $t[13]=0.2$ ,  
373  $p=0.87$ ). Most importantly, Experiment 2 replicated the key finding of Experiment 1: a  
374 difference between the approximation of regular and irregular pairs in OSC ( $t[13]=3.4$ ,  
375  $p=0.004$ ), with no such difference in EVC ( $t[13]=0.77$ ,  $p=0.46$ ; interaction across regions:  
376  $t[13]=3.3$ ,  $p=0.006$ ). These results closely resemble the pattern of results obtained in  
377 Experiment 1, providing further evidence for an influence of positional regularities on  
378 multi-object coding in OSC.

379 Experiment 2 was additionally designed to test a possible explanation for the  
380 regularity effect: perhaps regularly positioned object pairs more strongly induced a  
381 mental representation of the corresponding scene, thereby distorting the representation  
382 of the individual objects. To test this account, participants viewed images of room scenes  
383 and street scenes during separate blocks of Experiment 2 (Fig. 1, A). None of these  
384 scenes contained any of the objects belonging to the pairs. OSC response patterns to  
385 these scenes were reliably discriminable in a two-way classification analysis (mean  
386 accuracy: 64%;  $t[13]=9.1$ ,  $p<0.001$ ). To determine whether the relatively inaccurate pair  
387 approximation for regularly positioned pairs in OSC reflected the activation of the  
388 corresponding scene representations (e.g., living room for sofa-TV pairs), we correlated  
389 the activation patterns evoked by the pair stimuli to the activation patterns of the scene  
390 stimuli. Separately for the regular and irregular conditions, this correlation was  
391 computed within scene type (i.e., sofa/TV and indoor room scene, and car/lights and

392 outdoor street scene) and between scene type (i.e., sofa/TV and outdoor street scene,  
393 and car/lights and indoor room scene). The difference of these within- and between-  
394 correlations was taken as a measure of scene approximation quality. In OSC, this scene  
395 approximation was not significantly different from chance, both for regularly ( $t[13]=0.4$ ,  
396  $p=0.69$ ) and irregularly ( $t[13]=0.2$ ,  $p=0.87$ ) positioned pairs and no difference was found  
397 when directly comparing discriminability for regular and irregular pairs ( $t[13]=0.7$ ,  
398  $p=0.50$ ). Similar results were obtained in scene-selective regions of visual cortex (see  
399 Supplementary Information). These results suggest that the differential coding of regular  
400 and irregular pairs in OSC does not reflect a difference in the degree to which they  
401 activate scene representations.

402

#### 403 *Transformation from independent to integrative coding*

404 The results from Experiments 1 and 2 demonstrate that a linear combination of  
405 single object response patterns accurately predicts the response patterns evoked by  
406 both regularly and irregularly positioned pairs. However, a relative disruption of this  
407 approximation was observed in the regular condition. This pattern of results suggests  
408 that responses to regularly positioned pairs reflect both an independent processing  
409 component and an integrative component that disrupts this independent processing to  
410 some degree. To reveal the transformation from independent to integrative processing  
411 at finer anatomical resolution we tracked the overall approximation quality (reflecting  
412 the independent component of multi-object representations) and the regularity effect  
413 (reflecting the relative disruption of independent coding in the regular condition) along  
414 the visual hierarchy. Combining the data from both experiments, we performed a  
415 searchlight analysis along the posterior-anterior axis of the occipitotemporal cortex (see

416 Materials and Methods). In brief, anatomically defined occipitotemporal cortex was  
417 divided into slices (width: 10mm) varying along the y-coordinate (in MNI space) in steps  
418 of 2mm (see Fig. 4, **A**). For each of these slices, comparably to the OSC analyses for  
419 Experiments 1 and 2, the 100 best pair-representing voxels were selected based on  
420 individual-participant searchlight maps. Then, for each slice separately, the pair  
421 approximation analysis was repeated, leading to a pair approximation value (within-  
422 correlation vs. between-correlation) and a regularity effect for each slice (Fig. 4, **B**).  
423 Generally, approximation quality across the two regularity conditions (i.e., the mean of  
424 the two conditions) was very robust and significantly above chance for all slices centered  
425 between  $Y=-100$  and  $Y=-34$  (Fig 4, **C**). To detect regularity effects, the difference of the  
426 linear approximation quality in the regular and irregular conditions was compared to  
427 zero. This analysis revealed an effect that emerged between  $Y=-80$  and  $Y=-84$ , and later  
428 between  $Y=-64$  and  $Y=-38$  (Fig 4, **D**). This pattern of results shows that highly accurate  
429 linear approximation can be observed at earlier processing stages than the relative  
430 breakdown of this approximation in the regular condition, suggesting that the  
431 integrative multi-object coding for regularly positioned objects is preceded by an  
432 independent representational stage.

433 To assess how the overall approximation quality and the regularity effect relate to  
434 object selectivity, the difference of the intact and scrambled object conditions in the  
435 functional localizer was computed for each slice (see Materials and Methods). All slices  
436 between  $Y=-98$  and  $Y=-30$  exhibited significant object-selectivity (Fig. 4, **C/D**).  
437 Interestingly, across slices object-selectivity almost perfectly predicted overall  
438 approximation quality ( $r=0.97$ ,  $p<0.001$ ). By contrast, object-selectivity did not  
439 significantly predict the regularity effect across slices ( $r=-0.05$ ,  $p=0.75$ ). These results

440 suggest that the independent component of multi-object processing is tightly linked to  
441 the degree of object-selectivity, while the encoding of object regularity emerges later in  
442 the visual hierarchy. In sum, this analysis shows that overall linear approximation  
443 (reflecting the independent component of multi-object processing) and its relative  
444 breakdown (reflecting an effect of positional structure) can be anatomically dissociated,  
445 revealing a transformation from independent to integrative coding of multi-object  
446 displays along the visual processing hierarchy.  
447

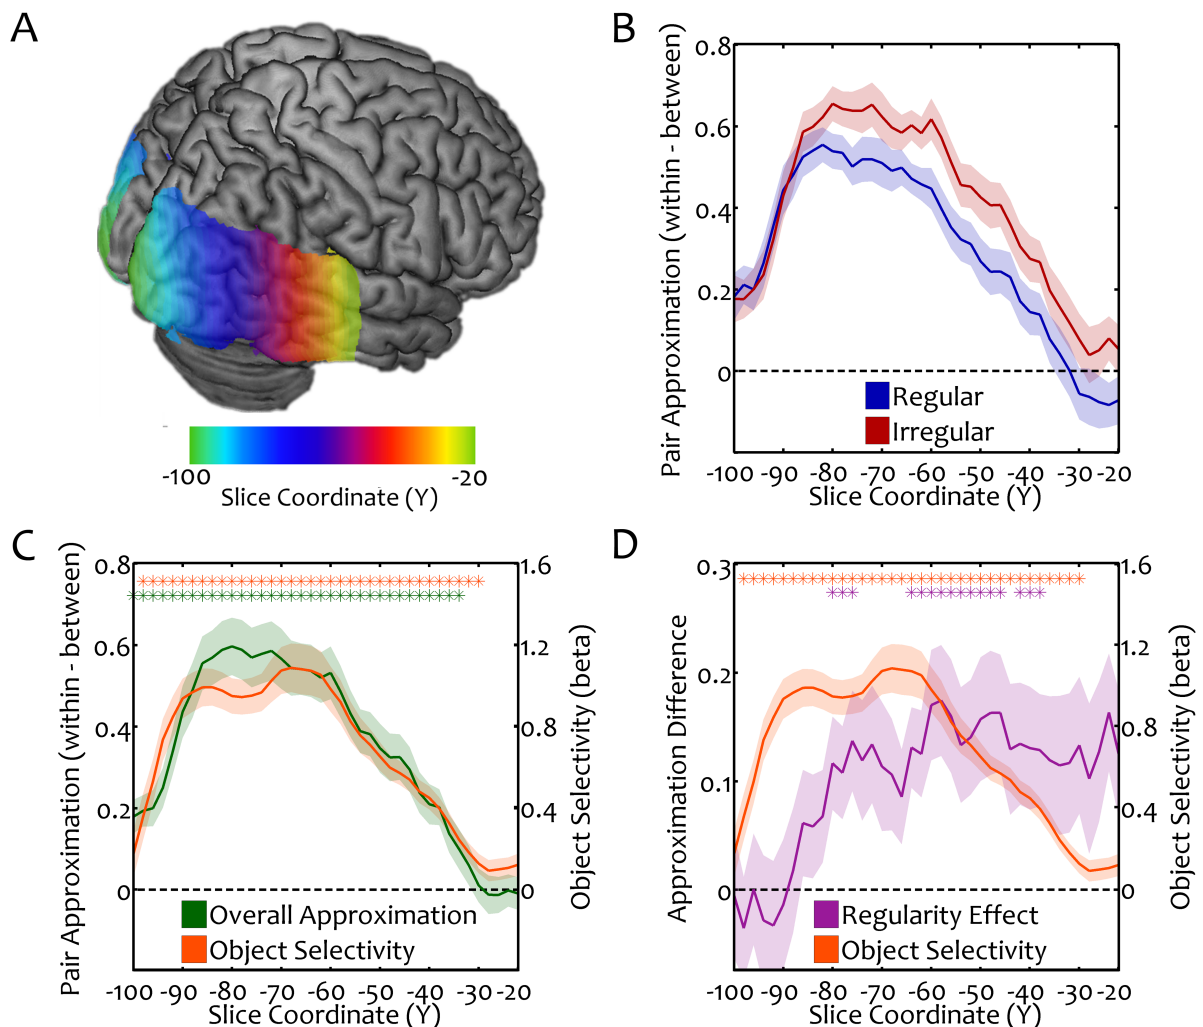

448

449 **Fig. 4.** Combined searchlight analysis. **A**, Searchlight analysis was performed for slices of  
450 occipitotemporal cortex (10mm width) with varying y-coordinate, in steps of 2mm. Slices

451 were defined in standard space (based on MNI coordinates) and back-projected into  
452 individual subject space. Subsequently, within each slice, the 100 best pair-representing  
453 voxels were selected on an individual-participant level. **B**, Pair approximation (expressed  
454 as the difference between within- and between correlations) for regular and irregular  
455 pairs in slices along the y-coordinate. **C**, Overall approximation (i.e., the mean of the  
456 regular and irregular conditions) was generally very accurate throughout the visual  
457 hierarchy, and showed a striking correspondence with the degree of object-selectivity. **D**,  
458 Differences between the regular and irregular conditions emerged starting from  $Y=-80$ .  
459 In contrast to the overall approximation, the regularity effects along the hierarchy did  
460 not correspond well with the degree of object-selectivity. (\* $p < 0.05$ , corrected for  
461 multiple comparisons)  
462

## 463 Discussion

464 In two fMRI experiments, we demonstrate non-independence in the visual cortex  
465 representation of multi-object displays, revealing a transformation from independent to  
466 integrative representations along the visual processing hierarchy. Response patterns in  
467 OSC evoked by regularly positioned object pairs were less accurately modeled by the  
468 response patterns evoked by their constituent objects. The relative breakdown of this  
469 linear response approximation reflects a disruption of independent multi-object coding  
470 when objects adhere to their typical real-world positions. The regularity effect was  
471 significant in functionally localized OSC (but not EVC and scene-selective regions; see  
472 Supplementary Information). However, further analyses revealed that object selectivity  
473 was closely related, along the posterior-anterior axis, to independent object coding  
474 rather than integrative object coding, which emerged later in the visual hierarchy.

475 The searchlight analysis along the posterior-anterior axis of the occipitotemporal  
476 cortex suggests that the coding of multiple, regularly positioned objects is reflecting two  
477 dissociable components: an independent processing component and an integrative  
478 component. Independent processing can be observed starting at early stages of the  
479 visual object processing hierarchy, and is tightly linked to object selectivity. The striking  
480 correspondence between object-selectivity and pair approximation suggests that the  
481 same neural mechanisms support single-object coding and (independent) multi-object  
482 coding. By contrast, at later stages of the processing hierarchy, pair approximation  
483 quality diverges for regular and irregular pairs, reflecting additional, integrative  
484 processing for regularly positioned pairs that (partly) disrupts independent coding.  
485 Interestingly, this relative disruption cannot be explained by differences in object-  
486 selectivity along the visual hierarchy. We speculate that the independent and integrative



487 components of multi-object coding are reflecting activity in different sub-regions of  
488 object-selective cortex, with a more posterior sub-region – possibly reflecting LO1  
489 (Larsson and Heeger, 2006) ( $Y=-90$ ,  $SE=5$ ) – primarily reflecting independent coding and a  
490 more anterior sub-region – possibly reflecting LO2 (Larsson and Heeger, 2006) ( $Y=-83$ ,  
491  $SE=6$ ) – containing also an integrative component. This assumption is consistent with a  
492 previously reported difference in spatial summation along the posterior-anterior axis,  
493 with a higher rate of information compression in the more anterior LO2 (Kay et al., 2013).  
494 However, further studies employing retinotopic mapping techniques are needed to test  
495 whether the effect can indeed be pinpointed to a specific sub-region of object-selective  
496 occipitotemporal cortex.

497         The disruption of independent coding observed here is unlikely to reflect  
498 differential semantic associations between objects. Previous electrophysiological studies  
499 have demonstrated that learned associations between objects can alter neural tuning  
500 properties in visual cortex: The associative pairing of two objects can shape neural  
501 responses in a way that neurons become selective to both of the individual objects  
502 (Messinger et al., 2001; Sakai et al., 1991). However, in our study the objects were equally  
503 related in their semantic content in both the regular and irregular conditions – the crucial  
504 difference was the positional structure. Thus, our results are more aptly explained by  
505 visual group representations that are shaped by co-occurrence structure of objects in  
506 real-world environments. Such group representations have been described in the cortical  
507 representation of people, where information from the face and body is integrated into a  
508 person representation, which is sensitive to the correct relative positioning of both parts  
509 (Bernstein et al., 2014; Harry et al., 2016; Schmalzl et al., 2012; but see Kaiser et al., 2014b).  
510 Similarly, regularly positioned objects may be grouped in visual cortex, giving rise to

511 different response patterns to the whole than the sum of the parts. Further studies are  
512 required to probe the nature of these representations at a finer grained level.

513 A number of previous studies have explored relational coding of objects in the  
514 context of action relationships. Some of these studies have reported univariate  
515 activation differences between objects positioned correctly or incorrectly for performing  
516 a specific action (Kim and Biederman, 2011; Kim et al., 2011; Roberts and Humphreys,  
517 2010). Others have used similar methods as the current study to demonstrate that action  
518 relationships alter combination rules in the processing of multiple objects (Baeck et al.,  
519 2013; Baldassano et al., 2016). Notably, the regularity effects observed in these studies  
520 have been attributed to processing asymmetries favoring the “active” object (e.g., a  
521 hammer) over the “passive” object (e.g., a nail) in a pair (Baeck et al., 2013; Riddoch et  
522 al., 2003). By contrast, our approach focused on real-world object structure more  
523 generally, avoiding such direct functional interactions of the two objects. Furthermore, in  
524 our study the positional structure of the object pairs was solely manipulated by  
525 exchanging the position of the single objects, without introducing changes of low-level  
526 visual characteristics (like physically connecting the objects differently; see Kim and  
527 Biederman, 2011; Baldassano et al., 2016). Therefore, the relative disruption of  
528 independent coding in the regular condition observed in our data cannot be explained by  
529 low-level visual interactions between the two stimuli. Our results thus provide strong  
530 evidence for sensitivity for positional structure in visual cortex, which is not attributable  
531 to a shift of weights in favor of one of the objects and is independent of low-level visual  
532 content.

533 How does this sensitivity for positional regularities arise from the typical relative  
534 positioning of objects? In the present study, we interchanged the position of the object

535 pairs to disrupt positional structure while keeping the individual objects identical. In the  
536 irregular displays, positional structure was disrupted on multiple levels: The objects did  
537 not adhere to their typical relative viewpoints and sizes, the laws of physics were partly  
538 violated, and the typical functional relationships between the objects were disrupted. All  
539 these factors constitute properties of positional object structures in real-world scenes, so  
540 that all of them potentially contribute to the effects observed here. Thus, while our study  
541 provides clear evidence for a role of positional structure in multi-object representations,  
542 further studies are needed to disentangle the relative contributions of the different  
543 aspects our manipulation entailed.

544         The sensitivity for positional structure observed here may reflect the grouping (or  
545 integration) of multiple, regularly positioned objects. Such grouping may provide an  
546 efficient way to deal with the large number of objects contained in natural scenes (Kaiser  
547 et al., 2014a). As a result of limitations in visual capacity, parallel processing of objects is  
548 associated with competition for representation between individual stimuli: When  
549 multiple objects need to be processed at the same time, neural processing becomes less  
550 efficient and behavioral performance decreases (Desimone and Duncan, 1995; Franconeri  
551 et al., 2013; Kastner and Ungerleider, 2001). Processing objects in meaningful chunks  
552 might help to reduce the complexity of a scene by reducing the number of competing  
553 objects. Behavioral evidence suggests that regularly positioned objects can be more  
554 efficiently processed in a number of visual tasks (Gronau and Shachar, 2014, 2015; Kaiser  
555 et al., 2014a, 2015; Stein et al., 2015). These behavioral benefits have been linked to a  
556 reduction in competitive interactions in visual cortex when objects follow positional  
557 regularities (Kaiser et al., 2014a). Our current results provide an explanation for this  
558 reduction of neural competition: Regularly positioned arrangements of objects are not

559 recruiting independent and competing object representations, but are to some degree  
560 integrated into group representations at higher stages of visual cortex. Such group  
561 representations may constitute an integral step in the visual processing hierarchy,  
562 bridging the gap between individual object coding and the representation of complex  
563 visual scenes.  
564

565 **Acknowledgements**

566 The research was supported by the Autonomous Province of Trento, Call "Grandi  
567 Progetti 2012", project "Characterizing and improving brain mechanisms of attention –  
568 ATTEND".

569

570 **References**

- 571 Agam Y, Liu H, Papanastassiou A, Buia C, Golby AJ, Madsen JR, Kreiman G (2010) Robust  
572 selectivity to two-object images in human visual cortex. *Curr Biol* 20:1-8.
- 573 Baeck A, Wagemans J, Op de Beeck HP (2013) The distributed representation of random  
574 and meaningful object pairs in human occipitotemporal cortex: the weighted  
575 average as a general rule. *Neuroimage* 70:37-47.
- 576 Baldassano C, Beck DM, Fei-Fei L (2016) Human-object interactions are more than the  
577 sum of their parts. *Cereb Cortex*, DOI: 10.1093/cercor/bhw077.
- 578 Bar M (2004) Visual objects in context. *Nat Rev Neurosci* 5:617-629.
- 579 Bar M, Aminoff EM (2003) Cortical analysis of visual context. *Neuron* 38:347-358.
- 580 Bernstein M, Oron J, Sadeh B, Yovel G (2014) An integrated face-body representation in  
581 the fusiform gyrus but not the lateral occipital cortex. *J Cogn Neurosci* 26:2469-  
582 2478.
- 583 Brainard DH (1997) The psychophysics toolbox. *Spat Vis* 10:433-436.
- 584 Chun MM (2000) Contextual cueing of visual attention. *Trends Cogn Sci* 4:170-178.
- 585 Cichy RM, Chen Y, Haynes JD (2011) Encoding the identity and location of objects in  
586 human LOC. *Neuroimage* 54:2297-2307.
- 587 Desimone R, Duncan J (1995) Neural mechanisms of selective visual attention. *Annu Rev*  
588 *Neurosci* 18:193-222.
- 589 Eger E, Ashburner J, Haynes JD, Dolan RJ, Rees G (2008) fMRI activity patterns in human  
590 LOC carry information about object exemplars within category. *J Cogn Neurosci*  
591 20:356-370.
- 592 Epstein RA, Kanwisher N (1998) A cortical representation of the local visual environment.  
593 *Nature* 392:598-601.

- 594 Franconeri SL, Alvarez GA, Cavanagh P (2013) Flexible cognitive resources: competitive  
595 content maps for attention and memory. *Trends Cogn Sci* 17:134-141.
- 596 Grill-Spector K (2003) The neural basis of object perception. *Curr Opin Neurobiol* 13:159-  
597 166.
- 598 Grill-Spector K, Kushnir T, Hendler T, Malach R (2000) The dynamics of object-selective  
599 activation correlate with recognition performance in humans. *Nat Neurosci* 3:837-  
600 843.
- 601 Gronau N, Shachar M (2014) Contextual integration of visual objects necessitates  
602 attention. *Atten Percept Psychophys* 76:695-714.
- 603 Gronau N, Shachar M (2015) Contextual consistency facilitates long-term memory of  
604 perceptual detail in barely seen images. *J Exp Psychol Hum Percept Perform*  
605 41:1095-1111.
- 606 Harry BB, Umla-Runge K, Lawrence AD, Graham KS, Downing PE (2016) Evidence for  
607 integrated visual face and body representations in the anterior temporal lobes. *J*  
608 *Cogn Neurosci* 28:1178-1193.
- 609 Hasson U, Levy I, Behrmann M, Hendler T, Malach R (2002) Eccentricity bias as an  
610 organizing principle for human high-order object areas. *Neuron* 34:479-490.
- 611 Haushofer J, Livingstone MS, Kanwisher N (2008) Multivariate patterns in object-  
612 selective cortex dissociate perceptual and physical shape similarity. *PLoS Biol*  
613 6:e187.
- 614 Haxby JV, Gobbini MI, Furey ML, Ishai A, Schouten JL, Pietrini P (2001) Distributed and  
615 overlapping representations of faces and objects in ventral temporal cortex.  
616 *Science* 293:2425-2430.

- 617 Kaiser D, Stein T, Peelen MV (2014a) Object grouping based on real-world regularities  
618 facilitates perception by reducing competitive interactions in visual cortex. Proc  
619 Natl Acad Sci USA 111:11217-11222.
- 620 Kaiser D, Stein T, Peelen MV (2015) Real-world spatial regularities affect visual working  
621 memory for objects. Psychon Bull Rev 22:1784-1790.
- 622 Kaiser D, Strnad L, Seidl KN, Kastner S, Peelen MV (2014b) Whole-person evoked fMRI  
623 activity patterns in human fusiform gyrus are accurately modeled by a linear  
624 combination of face- and body-evoked activity patterns. J Neurophysiol 111:82-90.
- 625 Kastner S, Ungerleider LG (2001) The neural basis of biased competition in the human  
626 visual cortex. Neuropsychologia 39:1263-1276.
- 627 Kay KN, Winawer J, Mezer A, Wandell BA (2013) Compressive spatial summation in  
628 human visual cortex. J Neurophysiol 110:481-494.
- 629 Kim JG, Biederman I (2011) Where do objects become scenes? Cereb Cortex 21:1738-1746.
- 630 Kim JG, Biederman I, Juan CH (2011) The benefit of object interactions arises in the lateral  
631 occipital cortex independent of attentional modulation from the intraparietal  
632 sulcus: A TMS study. J Neurosci 31:8320-8324.
- 633 Kourtzi Z, Kanwisher N (2001) Representation of perceived object shape by the human  
634 lateral occipital complex. Science 293:1506-1509.
- 635 Kriegeskorte N, Mur M, Ruff DA, Kiani R, Bodurka J, Esteky H, Tanaka K, Bandettini PA  
636 (2008) Matching categorical object representations in inferior temporal cortex of  
637 man and monkey. Neuron 60:1126-1141.
- 638 Kubilius J, Baeck A, Wagemans J, Op de Beeck HP (2015) Brain-decoding fMRI reveals  
639 how wholes relate to the sum of parts. Cortex 72:5-14.



- 640 Larsson J, Heeger DJ (2006) Two retinotopic visual areas in human lateral occipital  
641 cortex. *J Neurosci* 26:13128-13142.
- 642 MacEvoy SP, Epstein RA (2009) Decoding the representation of multiple simultaneous  
643 objects in human occipitotemporal cortex. *Curr Biol* 19:943-947.
- 644 MacEvoy SP, Epstein RA (2011) Constructing scenes from objects in human  
645 occipitotemporal cortex. *Nat Neurosci* 14:1323-1329.
- 646 Malach R, Reppas JB, Benson RR, Kwong KK, Jiang H, Kennedy WA, Ledden JP, Brady TJ,  
647 Rosen BR, Tootell RB (1995) Object-related activity revealed by functional  
648 magnetic resonance imaging in human occipital cortex. *Proc Natl Acad Sci USA*  
649 92:8135-8139.
- 650 Messinger A, Squire LR, Zola SM, Albright TD (2001) Neural representations of stimulus  
651 associations develop in the temporal lobe during learning. *Proc Natl Acad Sci USA*  
652 98:12239-12244.
- 653 Oliva A, Torralba A (2007) The role of context in object recognition. *Trends Cogn Sci*  
654 11:520-527.
- 655 Oosterhof NN, Connolly AC, Haxby JV (2016) CoSMoMVPA: multi-modal multivariate  
656 pattern analysis of neuroimaging data in Matlab / GNU Octave. *Front Neuroinform*  
657 10:20.
- 658 Reddy L, Kanwisher NG, VanRullen R (2009) Attention and biased competition in multi-  
659 voxel object representations. *Proc Natl Acad Sci USA* 106:21447-21452.
- 660 Riddoch MJ, Humphreys GW, Edwards S, Baker T, Willson K (2003) Seeing the action:  
661 neuropsychological evidence for action-based effects on object selection. *Nat*  
662 *Neurosci* 6:82-89.

- 663 Roberts KL, Humphreys GW (2010) Action relationships concatenate representations of  
664 separate objects in the ventral visual system. *Neuroimage* 52:1541–1548.
- 665 Rorden C, Brett M (2000) Stereotaxic display of brain lesions. *Behav Neurol* 12:191-200.
- 666 Sakai K, Miyashita Y (1991) Neural organization for the long-term memory of paired  
667 associates. *Nature* 354:152-155.
- 668 Schmalzl L, Zopf R, Williams MA (2012) From head to toe: evidence for selective brain  
669 activation reflecting visual perception of whole individuals. *Front Hum Neurosci*  
670 6:108.
- 671 Smith SM, Nichols TE (2009) Threshold-free cluster enhancement: Addressing problems  
672 of smoothing, threshold dependence and localisation in cluster inference.  
673 *Neuroimage* 44:83-98.
- 674 Stein T, Kaiser D, Peelen MV (2015) Interobject grouping facilitates visual awareness. *J Vis*  
675 15:10.
- 676 Vuilleumier P, Henson RN, Driver J, Dolan RJ (2002) Multiple levels of visual object  
677 constancy revealed by event-related fMRI of repetition priming. *Nat Neurosci*  
678 5:491-499.
- 679 Williams MA, Dang S, Kanwisher NG (2007) Only some spatial patterns of fMRI response  
680 are read out in task performance. *Nat Neurosci* 10:685-686.
- 681 Wolfe JM, Võ ML-H, Evans KK, Greene MR (2011) Visual search in scenes involves selective  
682 and nonselective pathways. *Trends Cogn Sci* 15:77-84.
- 683 Zoccolan D, Cox DD, DiCarlo JJ (2005) Multiple object normalization in monkey  
684 inferotemporal cortex. *J Neurosci* 25:8150-8164.
- 685
